# Supplementary material for: In depth investigation of the metabolism of Nectandra megapotamica chemotypes
Source: PubMed Central journal article supplement (PMC6078319; doi:10.1371/journal.pone.0201996), 2018-08-06
Supplement: pone.0201996.s001.pdf [file pone.0201996.s001.pdf]

**S1 Table: Identification and location of the studied material.**

| <b>Sample</b> | <b>Material</b>                   | <b>Location<br/>city-state-country (abv)</b> | <b>Day of<br/>collect</b> | <b>Vouchers</b> |
|---------------|-----------------------------------|----------------------------------------------|---------------------------|-----------------|
| C1            | <i>N. megapotamica</i>            | Campo Grande - MS, Brazil (C)                | 17/10/2013                | CGMS 46207      |
| C2            | <i>N. megapotamica</i>            | Campo Grande - MS, Brazil (C)                | 19/11/2013                | CGMS 66304      |
| C3            | <i>N. megapotamica</i>            | Campo Grande - MS, Brazil (C)                | 19/11/2013                | CGMS 66303      |
| M1            | <i>N. megapotamica</i>            | Maracaju - MS, Brazil (M)                    | 05/03/2014                | CGMS 66314      |
| P1            | <i>N. megapotamica</i>            | Ponta Porã - MS, Brazil (P)                  | 05/03/2014                | CGMS 66312      |
| P2            | <i>N. megapotamica</i>            | Ponta Porã - MS, Brazil (P)                  | 05/03/2014                | CGMS 66313      |
| S1            | <i>N. megapotamica</i>            | São Paulo - SP, Brazil (S)                   | 01/11/2014                | SPSF 39648      |
| S2            | <i>N. megapotamica</i>            | São Paulo - SP, Brazil (S)                   | 01/11/2014                | SPSF 39648      |
| S3            | <i>N. megapotamica</i>            | São Paulo - SP, Brazil (S)                   | 01/11/2014                | SPSF 39648      |
| S4            | <i>N. megapotamica</i>            | São Paulo - SP, Brazil (S)                   | 01/11/2014                | SPSF 39648      |
| S5            | <i>N. megapotamica</i>            | São Paulo - SP, Brazil (S)                   | 01/11/2014                | SPSF 39648      |
| S6            | <i>N. megapotamica</i> - seedling | São Paulo - SP, Brazil (S)                   | 01/11/2014                | SPSF 39648      |
| S7            | <i>N. megapotamica</i> - seedling | São Paulo - SP, Brazil (S)                   | 01/11/2014                | SPSF 39648      |

Abv: abbreviation
