# Supplementary material for: In depth investigation of the metabolism of Nectandra megapotamica chemotypes
Source: PubMed Central journal article supplement (PMC6078319; doi:10.1371/journal.pone.0201996), 2018-08-06
Supplement: pone.0201996.s002.pdf [file pone.0201996.s002.pdf]

**S2 Table. Compounds identified by CG-MS of S6 and S7 after scraping method.**

| <b>Compounds</b>                  |                                 |      |      | <b>S6IP</b> | <b>S6A</b>  | <b>S6B</b>  | <b>S7IP</b> | <b>S7A</b> | <b>S7B</b> |
|-----------------------------------|---------------------------------|------|------|-------------|-------------|-------------|-------------|------------|------------|
| n.                                | <b>Monoterpene hydrocarbons</b> | RI   | RIL  |             |             |             |             |            |            |
| 1                                 | camphene                        | 951  | 954  | -           | -           | -           | 0.1         | -          | -          |
| 2                                 | limonene                        | 1031 | 1029 | -           | -           | -           | 0.3         | 0.1        | -          |
| 3                                 | $\alpha$ -phellandrene          | 1006 | 1003 | -           | -           | -           | 0.2         | -          | -          |
| 4                                 | $\alpha$ -pinene                | 979  | 939  | -           | tr          | -           | 0.9         | -          | -          |
| 5                                 | $\alpha$ -terpinolene           | 1088 | 1089 | -           | -           | -           | 0.5         | tr         | -          |
| 6                                 | $\alpha$ -thujene               | 931  | 930  | tr          | -           | -           | 0.1         | 0.1        | -          |
| 7                                 | $\beta$ -myrcene                | 991  | 991  | -           | -           | -           | 0.5         | tr         | -          |
| 8                                 | $\beta$ -phellandrene           | 1062 | 1030 | -           | -           | -           | tr          | -          | -          |
| 9                                 | $\beta$ -pinene                 | 957  | 979  | -           | -           | -           | 0.3         | 0.1        | -          |
| 10                                | $\gamma$ -terpinene             | 1059 | 1060 | -           | -           | -           | 0.1         | -          | -          |
| 11                                | $\delta$ -3-carene              | 1012 | 1031 | tr          | -           | -           | 3.9         | 0.1        | -          |
| 12                                | (E)- $\beta$ -ocimeno           | 1040 | 1050 | -           | -           | -           | 0.1         | -          | -          |
| 13                                | (Z)- $\beta$ -ocimeno           | 1050 | 1037 | -           | -           | -           | 0.8         | tr         | -          |
| <b>Oxygenated Monoterpene</b>     |                                 |      |      |             |             |             |             |            |            |
| 14                                | eucalyptol                      | 1034 | 1033 | -           | -           | -           | 0.4         | 0.2        | -          |
| <b>Sesquiterpene hydrocarbons</b> |                                 |      |      |             |             |             |             |            |            |
| 15                                | alloaromadendrene               | 1464 | 1486 | 0.8         | 1.2         | -           | 1.0         | 1.0        | 0.6        |
| 16                                | bicycloelemene                  | 1341 | 1336 | 1.4         | 2.0         | -           | 0.8         | 0.9        | 0.7        |
| 17                                | bicyclogermacrene               | 1499 | 1500 | 9.1         | 15.2        | tr          | 4.9         | 5.7        | 4.1        |
| 18                                | cadina-3,5-diene                | 1454 | 1454 | -           | -           | -           | 0.4         | 0.4        | 0.3        |
| 19                                | germacrene D                    | 1484 | 1485 | 17.0        | 25.3        | 26.0        | 5.8         | 6.6        | 6.2        |
| 20                                | sesquisabinene                  | 1461 | 1460 | -           | -           | -           | 21.4        | 20.2       | 19.1       |
| 21                                | sesquithujene                   | 1408 | 1417 | -           | -           | -           | 2.7         | 1.9        | 1.3        |
| 22                                | $\alpha$ -copaene               | 1379 | 1377 | -           | -           | -           | 0.3         | 0.2        | 0.1        |
| 23                                | $\alpha$ -humulene              | 1457 | 1455 | -           | -           | -           | 0.2         | 0.2        | 0.2        |
| 24                                | $\alpha$ -muurolene             | 1503 | 1500 | -           | -           | -           | 0.5         | 0.6        | 0.6        |
| 25                                | $\beta$ -bourbonene             | 1387 | 1388 | -           | -           | -           | tr          | tr         | -          |
| 26                                | $\beta$ -bisabolene             | 1514 | 1506 | 7.5         | 0.5         | -           | 25.1        | 29.2       | 32.8       |
| 27                                | $\beta$ -curcumene              | 1515 | 1516 | -           | -           | -           | 0.2         | 0.2        | 0.3        |
| 28                                | $\beta$ -elemene                | 1394 | 1391 | 0.7         | 0.9         | -           | 0.2         | 0.2        | 0.2        |
| 29                                | $\beta$ -sesquiphellandrene     | 1527 | 1523 | -           | -           | -           | 2.2         | 2.9        | 3          |
| 30                                | $\gamma$ -amorphene             | 1494 | 1496 | -           | -           | -           | 0.4         | 0.4        | 0.4        |
| 31                                | cis- $\alpha$ -bergamotene      | 1418 | 1413 | -           | -           | -           | 2.0         | 1.5        | 0.9        |
| 32                                | trans-caryophyllene             | 1422 | 1419 | 2.4         | 3.4         | tr          | 1.0         | 0.8        | 0.9        |
| 33                                | trans- $\alpha$ -bergamotene    | 1439 | 1435 | -           | -           | -           | 1.0         | 0.8        | 0.5        |
| 34                                | Epi- $\beta$ -santalene         | 1451 | 1447 | -           | -           | -           | 0.9         | 0.8        | 0.5        |
| 35                                | (E)- $\alpha$ -bisabolene       | 1547 | 1540 | -           | -           | -           | 3.8         | -          | 6.2        |
| 36                                | (E)- $\beta$ -farnesene         | 1487 | 1457 | -           | -           | -           | 0.9         | 1.0        | 0.8        |
| 37                                | (E)- $\gamma$ -bisabolene       | 1536 | 1531 | -           | -           | -           | 12.3        | -          | 17.9       |
| 38                                | (Z)- $\alpha$ -bisabolene       | 1505 | 1507 | -           | -           | -           | 0.5         | 0.7        | 0.8        |
| 39                                | (Z)- $\beta$ -farnesene         | 1461 | 1446 | 5.8         | 9.3         | -           | -           | -          | -          |
| <b>Oxygenated sesquiterpene</b>   |                                 |      |      |             |             |             |             |            |            |
| 40                                | $\alpha$ -bisabolol             | 1687 | 1686 | <b>31.4</b> | <b>11.6</b> | <b>41.9</b> | -           | -          | -          |

The individuals S6 and S7 were identified as *Nectandra megapotamica*. S6A: analysis of adaxial surface; S6B: analysis of abaxial surface; S6IP: analysis of intact leaves; S7A: analysis of adaxial surface; S7B: analysis of abaxial surface; S7IP: analysis of intact leaves; n: number; RI: retention index of compound; RIL: retention index of literature.
