# Supplementary material for: In depth investigation of the metabolism of Nectandra megapotamica chemotypes
Source: PubMed Central journal article supplement (PMC6078319; doi:10.1371/journal.pone.0201996), 2018-08-06
Supplement: pone.0201996.s004.pdf [file pone.0201996.s004.pdf]

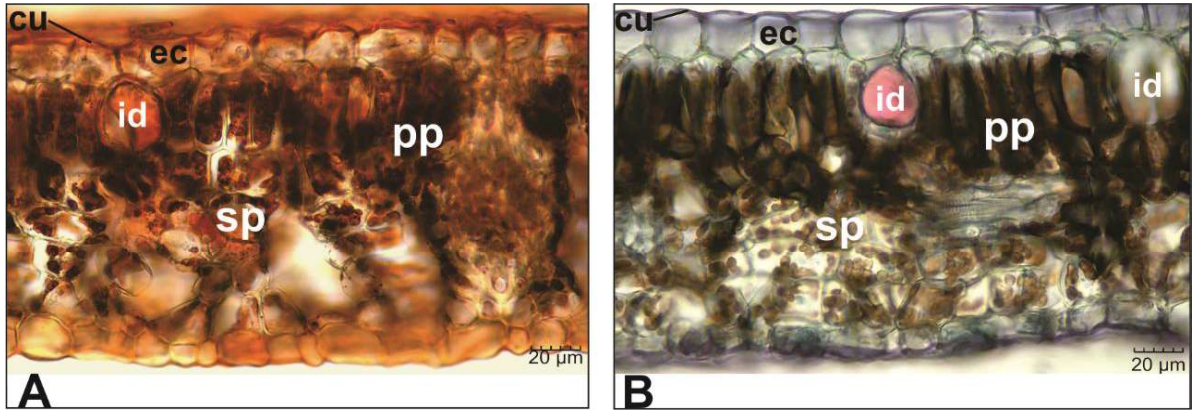

**S2 Fig. Histochemical analysis of S7 leaves.** (A: dye Sudan IV; B: dye Nile Blue; cu: cuticle; ec: epidermal cell; id: idioblast; pp: palisade parenchyma; sp: spongy parenchyma).
