# Supplementary material for: In depth investigation of the metabolism of Nectandra megapotamica chemotypes
Source: PubMed Central journal article supplement (PMC6078319; doi:10.1371/journal.pone.0201996), 2018-08-06
Supplement: pone.0201996.s005.pdf [file pone.0201996.s005.pdf]

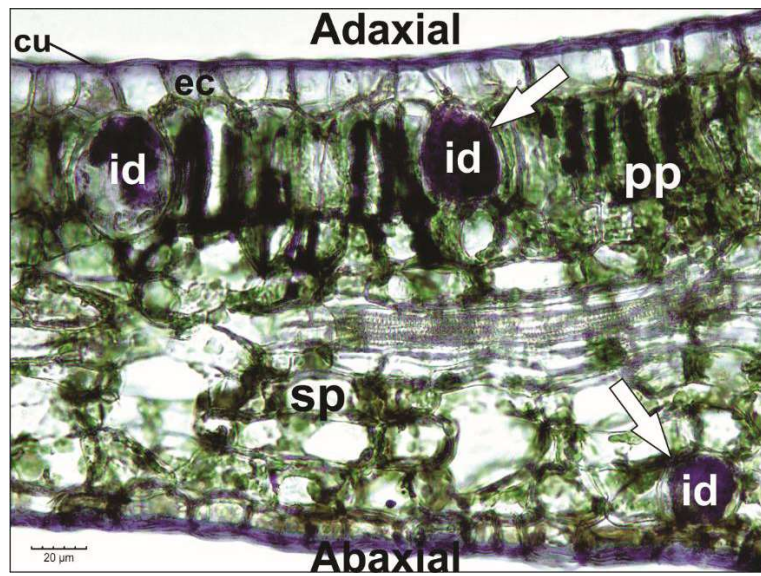

**S3 Fig. Idioblasts present on the adaxial and abaxial surfaces of S7 leaves.** (dye: NADI; cu: cuticle; ec: epidermal cell; id: idioblast; pp: palisade parenchyma; sp: spongy parenchyma).
