# Supplementary material for: In depth investigation of the metabolism of Nectandra megapotamica chemotypes
Source: PubMed Central journal article supplement (PMC6078319; doi:10.1371/journal.pone.0201996), 2018-08-06
Supplement: pone.0201996.s006.pdf [file pone.0201996.s006.pdf]

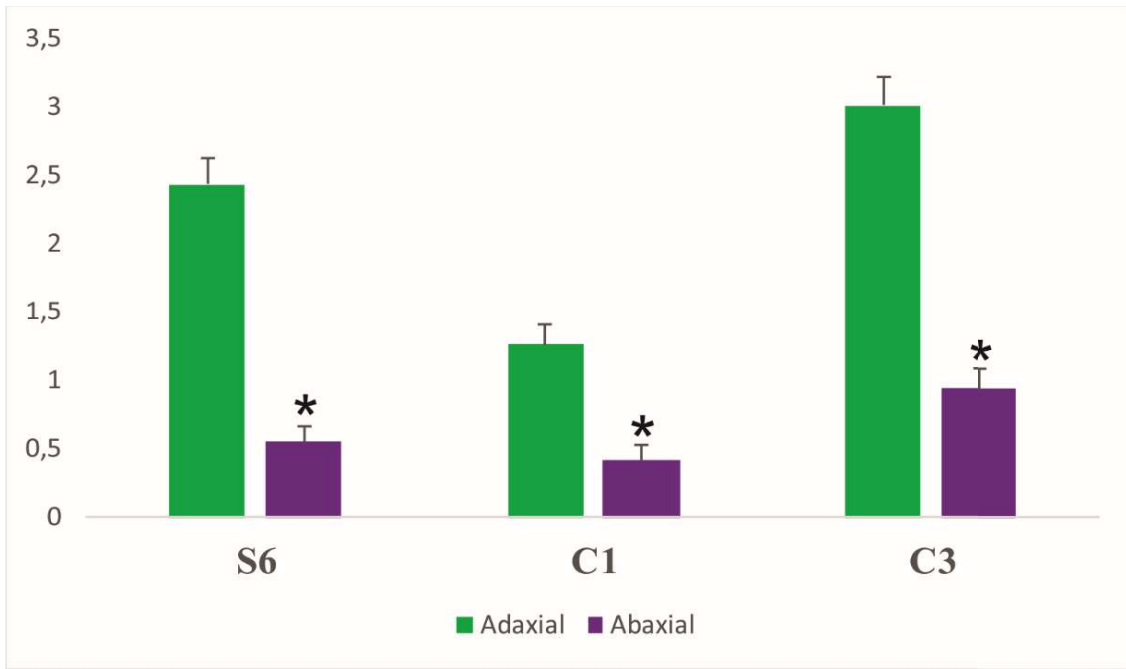

**S4 Fig. Number of idioblasts between the Adaxial and Abaxial surfaces of *Nectandra megapotamica*. Sample S6: Chemotype A; Sample C1 and C3: Chemotype B.**
