# Supplementary material for: In depth investigation of the metabolism of Nectandra megapotamica chemotypes
Source: PubMed Central journal article supplement (PMC6078319; doi:10.1371/journal.pone.0201996), 2018-08-06
Supplement: pone.0201996.s007.pdf [file pone.0201996.s007.pdf]

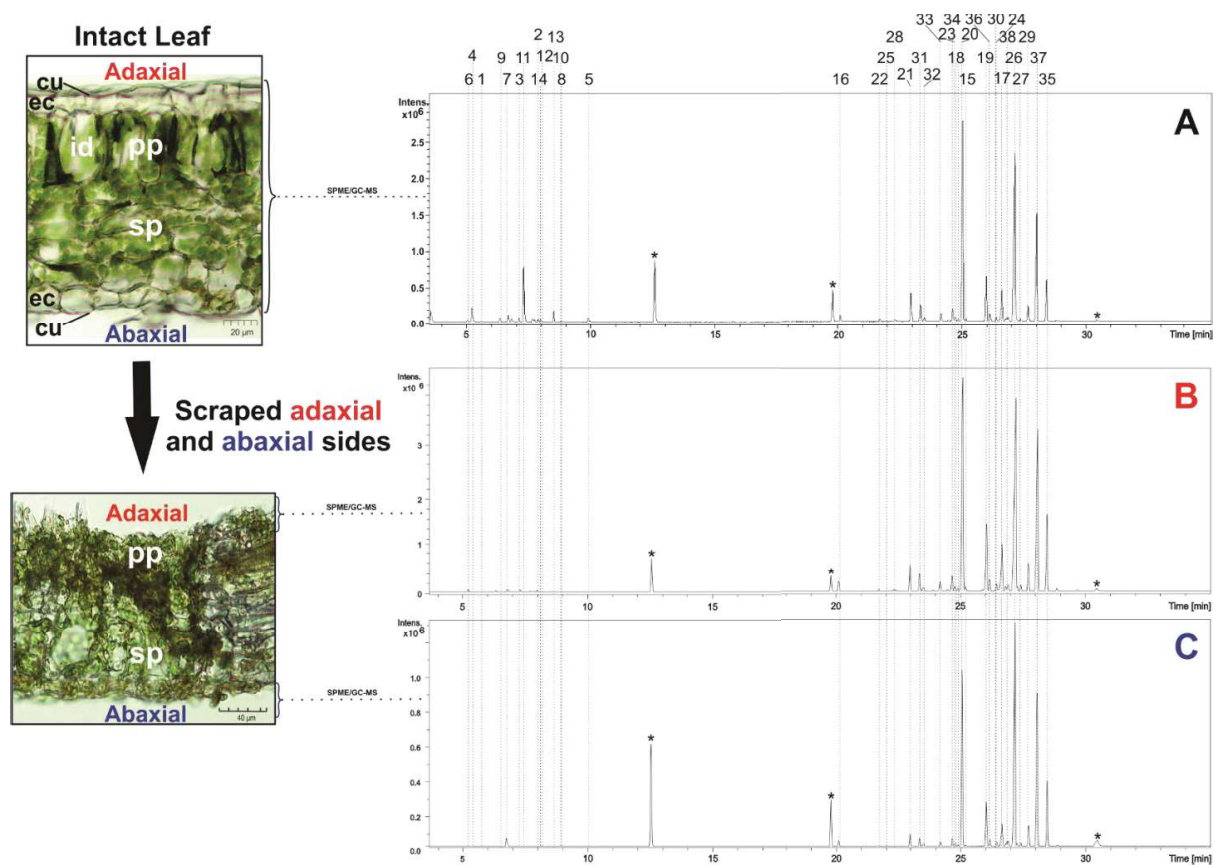

**S5 Fig. SPME analysis of intact leaves and adaxial and abaxial surfaces of S7 by GC-MS. (\*peak products of SPME fiber; cu: cuticle; ec: epidermal cell; id: idioblast; pp: palisade parenchyma; sp: spongy parenchyma; id: idioblast).**
