# Supplementary material for: In depth investigation of the metabolism of Nectandra megapotamica chemotypes
Source: PubMed Central journal article supplement (PMC6078319; doi:10.1371/journal.pone.0201996), 2018-08-06
Supplement: pone.0201996.s008.pdf [file pone.0201996.s008.pdf]

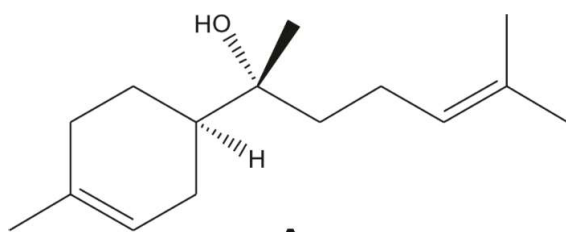

A

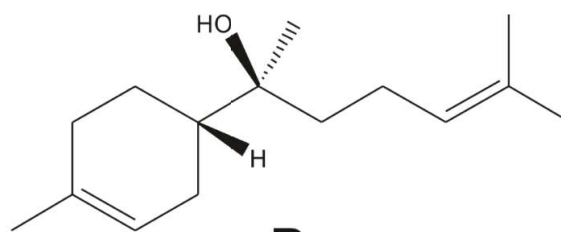

B

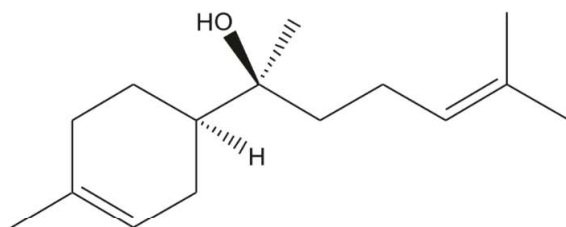

C

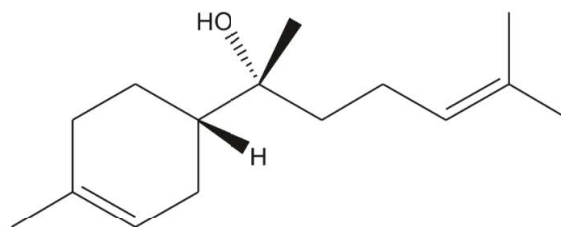

D

S6 Fig. Four different configurations of  $\alpha$ -bisabolol.
